# Supplementary material for: Three-Year Trends of Healthcare-Associated Infections and Antibiotic Use in Acute Care Hospitals: Findings from 2016–2018 Point Prevalence Surveys in Sicily, Italy
Source: MDPI journal article supplement (doi:10.3390/antibiotics10010001), 2020-12-22
Supplement: s1 [file s1]

## Supplementary Materials

# Three-Year Trends of Healthcare-Associated Infections and Antibiotic Use in Acute Care Hospitals: Findings from 2016–2018 Point Prevalence Surveys in Sicily, Italy

Martina Barchitta <sup>1</sup>, Andrea Maugeri <sup>1</sup>, Maria Clara La Rosa <sup>1</sup>, Claudia La Mastra <sup>1</sup>, Giuseppe Murolo <sup>2</sup> and Antonella Agodi <sup>1,3,\*</sup>

<sup>1</sup> Department of Medical and Surgical Sciences and Advanced Technologies “GF Ingrassia”, University of Catania, 95123 Catania, Italy; martina.barchitta@unict.it (M.B.); andrea.maugeri@unict.it (A.M.); maricllalarosa@gmail.com (M.C.L.R.); claudia.lamastra@unict.it (C.L.M.)

<sup>2</sup> Regional Health Authority of the Sicilian Region, 90145 Palermo, Italy; giuseppe.murolo@regione.sicilia.it

<sup>3</sup> AOU Policlinico “G. Rodolico-San Marco”, 95123 Catania, Italy

\* Correspondence: agodia@unict.it

## Index

- **Supplementary Table S1.** Distribution of the types of HAI by year of the Point Prevalence Survey
- **Supplementary Table S2.** Distribution of the antimicrobial agents by year of the Point Prevalence Survey
- **Supplementary Figure S1.** Relationship between prevalence of antibiotic use, prevalence of HAI and number of patients surveyed in each hospital.

**Table S1.** Distribution of the types of HAI by year of the Point Prevalence Survey.

| Types of Infection                              | 2016 (n = 349) | 2017 (n = 317) | 2018 (n = 371) |
|-------------------------------------------------|----------------|----------------|----------------|
| Urinary tract infections                        | 20.3%          | 14.5%          | 21.8%          |
| Pneumonia                                       | 28.5%          | 28.4%          | 31.5%          |
| Surgical site infections                        | 15.0%          | 14.2%          | 11.1%          |
| Bloodstream                                     | 5.1%           | 6.6%           | 7.0%           |
| Gastrointestinal system infections              | 4.0%           | 9.2%           | 4.9%           |
| Skin and soft tissue infections                 | 5.4%           | 9.2%           | 3.8%           |
| Eye, ears, nose or mouth infections             | 1.1%           | 1.9%           | 1.6%           |
| Systemic infections                             | 3.4%           | 1.6%           | 1.3%           |
| Cardiovascular system infections                | 2.0%           | 1.3%           | 1.6%           |
| Central vascular catheter-related infections    | 3.1%           | 5.4%           | 4.9%           |
| Peripheral vascular catheter-related infections | 1.4%           | 0.9%           | 1.1%           |
| Lower respiratory tract infections              | 5.4%           | 3.8%           | 5.9%           |
| Bone and joint infections                       | 2.8%           | 1.6%           | 1.9%           |
| Reproductive tract infections                   | 0.3%           | 0.3%           | 0.3%           |
| Central nervous system infections               | 0.3%           | 0.3%           | 0.8%           |

**Table S2.** Distribution of the antimicrobial agents by year of the Point Prevalence Survey.

| Antimicrobials                                              | 2016 (n = 4420) | 2017 (n = 4394) | 2018 (n = 4782) | p-Value |
|-------------------------------------------------------------|-----------------|-----------------|-----------------|---------|
| Third-generation cephalosporins                             | 21.86%          | 21.78%          | 22.38%          | 0.752   |
| Fluoroquinolones                                            | 19.00%          | 18.93%          | 14.37%          | <0.001  |
| Combinations of penicillins, incl. betalactamase inhibitors | 15.00%          | 13.18%          | 14.62%          | 0.035   |
| Carbapenems                                                 | 7.51%           | 7.26%           | 7.49%           | 0.883   |
| Glycopeptide antibacterials                                 | 6.31%           | 5.80%           | 5.00%           | 0.023   |
| First-generation cephalosporins                             | 5.75%           | 8.74%           | 7.80%           | <0.001  |
| Imidazole derivatives                                       | 4.59%           | 4.26%           | 4.33%           | 0.717   |
| Penicillins, extended spectrum                              | 3.51%           | 3.12%           | 3.85%           | 0.164   |
| Aminoglycosides                                             | 2.74%           | 2.59%           | 2.68%           | 0.916   |
| Macrolides                                                  | 2.24%           | 2.12%           | 4.18%           | <0.001  |

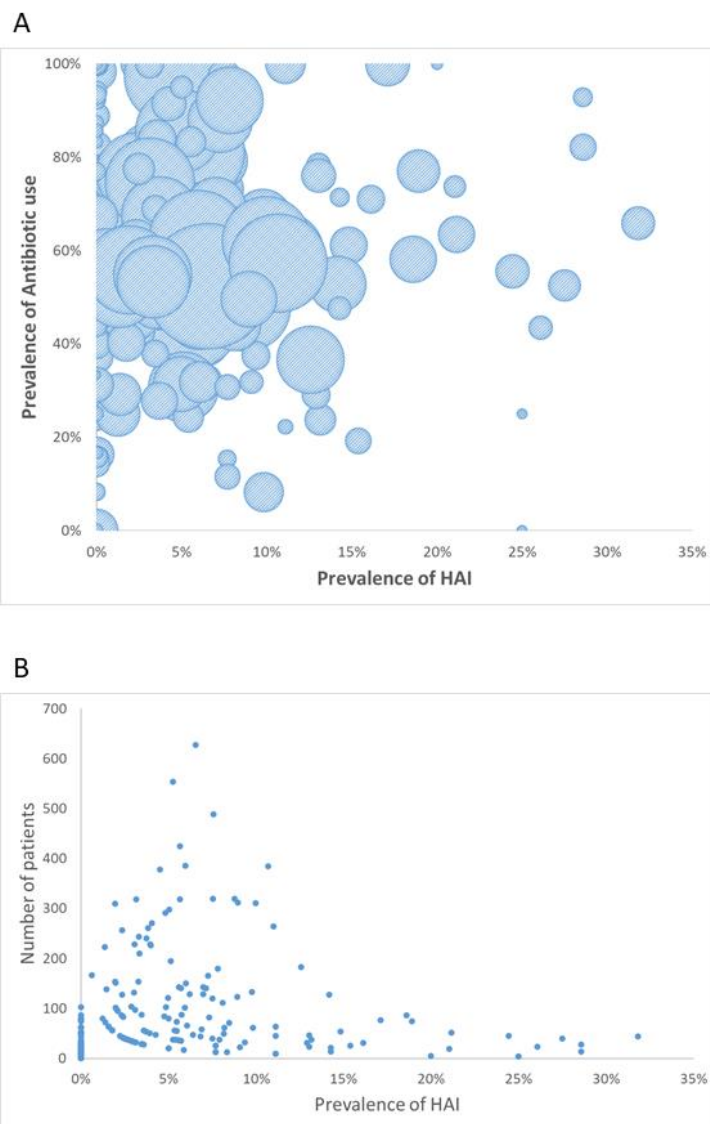

**Figure S1.** Relationship between prevalence of antibiotic use, prevalence of HAI and number of patients surveyed in each hospital. **(A)** The bubble graph reports the prevalence of HAI (x-axis) and the prevalence of antibiotic use (y-axis) in each hospital. The size of each bubble is proportional to the number of patients surveyed in each hospital. **(B)** This plot shows the correlation between the prevalence of HAI (x-axis) and the number of patients surveyed in each hospital (y-axis).
